# Supplementary material
Source: publisher figshare collection journal article supplement (https://gsapubs.figshare.com/ndownloader/files/22537451)
Supplement: Supplementary file 1 [file 22537451]

## Sheet: SED DEP AND CLIMATE MODELS
SUPPLEMENTAL DATA FILE 6: SEDIMENT DEPOSITION MODEL DATA FOR POWICK, BROADWAS AND BUILDWAS AND CLIMATIC DATASETS												20YR GROUPED DATES					CLIMATOLOGICAL DATA
POWICK, SEVERN-TEME CONFLUENCE				BROADWAS, WORCS - RIVER TEME				BUILDWAS, SHROPS - RIVER SEVERN					A	B	C		D	E	F	G	H	I
Depth (cm)	Modelled Calendrical Date	POWICK SEDIMENTATION INDEX		Depth (cm)	Modelled Calendrical Date	BROADWAS SEDIMENTATION INDEX		Depth (cm)	Modelled Calendrical Date	BROADWAS SEDIMENTATION INDEX		Age (BCE-CE)	Powick	Broadwas	Buildwas		Charman et al. 2006	Swindles et al. 2013	Wilson et al. 2013	Buntgen et al. 2011	Esper et al. 2014	Phipps et al. 2013
1	2017	3.09497		1	2017	1.15238		1	2016	0.576965		2000	2.73965	0.728638	0.542267		-0.1478	-0.658803	0.0323264	-0.26128	0.925387	0.803508
2	2015.4	2.74389		2	2012	0.799359		2	2010	0.259982		1980	1.63916	0.289186	0.283548		-0.7095	-0.455677	1.97806	0.149041	-0.539618	1.15702
3	2011.95	2.65382		3	2007	0.477549		3	2005	0.789855		1960	1.10075	0.778811	1.59206		-0.468867	-0.490084	0.497292	-0.0264656	-0.394218	0.749806
4	2008.05	2.60538		4	2002	0.48526		4	1998	0.456072		1940	1.31747	0.842839	1.21793		-0.9824	-0.984031	-0.251555	0.087316	0.255656	0.775175
5	2004.25	2.53528		5	1995	0.344024		5	1989	0.495229		1920	1.66935	-0.0743237	0.951527		-0.57305	-0.733925	-0.238674	0.221751	0.675419	0.30998
6	2000.4	2.80456		6	1989	0.172191		6	1981	-0.100657		1900	1.29653	-0.186333	0.614942		-0.66215	-1.0686	-0.0797778	0.333052	-0.979611	-0.156861
7	1996.2	2.11152		7	1982	0.351342		7	1972	1.30628		1880	1.35543	-0.401605	0.277292		-0.17805	-0.494738	-0.0153035	-0.0110509	-0.52571	-0.130175
8	1991.95	1.93044		8	1975	0.893211		8	1964	1.87784		1860	1.23056	-0.696985	0.20358		-0.15985	0.435433	1.58958	-0.519047	-0.487148	0.411124
9	1987.2	1.4736		9	1969	0.693659		9	1955	1.35859		1840	1.10749	-0.695459	0.619943		0.16435	0.142784	-0.0991934	0.201756	0.345425	-0.0642838
10	1983.15	1.04109		10	1962	0.749562		10	1946	1.07726		1820	1.42495	-0.637631	0.502757		0.29735	0.754843	-0.503837	-0.119415	-0.35692	-0.577085
11	1979.05	1.05391		11	1956	0.600997		11	1938	1.21058		1800	1.1391	-0.774445	0.460515		0.19775	1.06708	-1.39995	-0.350379	-0.339851	-0.624527
12	1974.75	1.0166		12	1949	1.47505		12	1929	0.862811		1780	1.24499	-0.94553	0.782243		0.1675	0.599526	-1.03094	-0.929012	-0.229853	0.633508
13	1970	1.16406		13	1942	0.45247		13	1920	0.781186		1760	0.81662	-0.504158	0.597283		0.00205	-0.507099	0.80503	-0.82129	0.141865	0.568934
14	1965.65	1.12996		14	1936	-0.0395612		14	1911	0.610691		1740	0.887999	0.362846	-0.752096		-0.01585	-1.24691	0.198295	-0.205511	-0.0952002	0.660194
15	1961.5	1.13923		15	1929	-0.103191		15	1902	0.45295		1720	1.04697	-0.578989	-0.454384		-0.01385	1.82822	0.992935	-1.30177	-0.2406	0.180174
16	1957.3	1.23172		16	1922	-0.0802191		16	1893	0.194294		1700	0.998311	0.165594	-0.420143		0.0126	0.02829	-0.0188062	-0.15054	-0.305082	-1.04623
17	1952.6	1.48773		17	1916	-0.0411954		17	1883	0.360289		1680	0.569885	0.360486	-0.507276		0.0036	0.250326	-0.625723	-0.0997076	-0.395483	-1.27339
18	1948.25	1.22011		18	1909	-0.13921		18	1874	0.184861		1660	1.32929	0.0868891	0.558826		0.1524	0.910593	0.0047943	-0.179198	-0.343644	-1.13387
19	1943.95	1.33032		19	1902	-0.378594		19	1865	0.2223		1640	0.554199	0.18793	-0.59209		0.20735	1.46573	-0.886757	-0.213232	-0.0123855	-0.724682
20	1939.2	1.75415		20	1896	-0.324792		20	1856	0.690495		1620	0.492788	0.536011	-1.83834		0.2415	0.4617	-0.208044	-0.182365	-0.0560055	-0.107113
21	1934.95	1.80107		21	1889	-0.248041		21	1847	0.549392		1600	0.792395	0.2752	-0.923178		0.06825	0.371773	0.244625	-0.267535	-1.04283	0.206201
22	1930.65	1.88745		22	1882	-0.63198		22	1838	0.749429		1580	0.448951	0.495297	-0.655331		0.14285	0.720356	1.14969	-0.417168	-0.274738	0.0012783
23	1926.4	1.52893		23	1875	-0.700233		23	1828	0.256085		1560	0.579173	0.305342	-0.722856		0.15375	0.369178	-0.00124422	-0.203803	-0.00353505	0.302403
24	1921.65	1.37518		24	1869	-0.747644		24	1819	0.0863922		1540	0.450114	-0.0946461	0.520477		0.2002	0.756821	0.084621	0.248681	-0.163475	-1.0571
25	1917.45	1.3843		25	1862	-0.643077		25	1809	0.510971		1520	-0.483379	0.182256	1.26356		0.2463	1.04205	0.31134	-0.13577	-0.157153	-1.65392
26	1913.25	1.24707		26	1855	-0.58728		26	1800	0.784183		1500	0.278781	-0.0649413	1.62424		0.10885	0.507745	-0.315518	0.309344	-0.0351437	-1.23221
27	1909.05	1.3472		27	1848	-0.579039		27	1790	0.676852		1480	0.208488	0.0427061	1.47623		0.09765	-0.272733	-0.031315	0.206315	-0.0914072	-1.04244
28	1904.3	1.12649		28	1842	-0.920056		28	1781	0.887633		1460	0.299913	-0.131838	1.32139		-0.05945	0.240591	-0.466094	0.627695	-0.936623	-2.52533
29	1900.2	1.37758		29	1835	-0.792255		29	1771	0.863881		1440	0.474815	0.135427	1.15753		-0.15365	0.153291	-0.190041	0.396121	-0.88036	-2.35204
30	1895.9	1.31907		30	1828	-0.684057		30	1762	0.330685		1420	0.320092	0.559982	0.885435		-0.1885	0.421836	-0.111107	0.06034	0.276518	-0.534585
31	1891.7	1.48724		31	1821	-0.436582		31	1753	-0.759263		1400	-0.153081	0.386945	0.515234		-0.28225	0.545601	-0.154774	-0.772587	0.170945	-0.735719
32	1887.05	1.51176		32	1814	-0.485642		32	1743	-0.744929		1380	-0.820911	0.32114	0.320654		-0.1376	0.677339	-0.272113	-0.314501	-0.58387	0.349845
33	1882.8	1.10364		33	1807	-0.827712		33	1733	-0.835975		1360	-0.367356	0.522713	0.417672		-0.22435	0.209071	0.102626	-0.256133	-0.185601	1.40576
34	1878.4	0.908		34	1801	-1.00998		34	1724	-0.0727936		1340	0.0822154	0.463165	0.19347		-0.09955	-0.126069	-0.448075	0.0977037	-0.652777	0.831182
35	1874.05	0.73974		35	1794	-0.959709		35	1714	-0.139314		1320	0.0444111	0.110739	0.0783575		-0.1147	0.732871	-0.524827	0.0938603	-0.539618	-0.742637
36	1869.9	1.78688		36	1787	-1.0025		36	1705	-0.700973		1300	0.409335	-0.389811	0.115741		-0.07825	0.253478	-0.632658	0.203535	-0.140717	-1.42198
37	1865.2	1.4441		37	1780	-0.87438		37	1695	-0.712021		1280	0.110871	-0.245364	-0.254202		-0.00205	0.600453	0.210232	0.347786	-0.347437	-1.64931
38	1861	1.27409		38	1773	-0.47316		38	1685	-0.302531		1260	0.0365945	-0.364339	-1.32588		0.2334	0.473752	0.06349	0.143186	-0.399276	-0.974246
39	1856.75	1.11694		39	1766	-0.535157		39	1675	0.836894		1240	0.262154	-0.126361	-1.94623		0.17545	0.269795	0.106479	-0.500021	-0.797545	1.39554
40	1852.05	1.04232		40	1759	0.439091		40	1666	0.280758		1220	-0.622756	-0.116038	-0.495083		0.4296	0.34257	-0.0147291	0.328221	-0.511803	0.525116
41	1847.85	1.13372		41	1752	0.827187		41	1656	-0.221176		1200	-0.131976	0.176856	0.386964		0.35285	0.469117	-0.339721	0.329457	-0.219106	0.599244
42	1843.65	1.13699		42	1746	-0.177741		42	1646	-0.963005		1180	0.21619	0.257424	0.45986		0.3776	0.443468	0.285724	0.0176173	-0.043362	0.480639
43	1839.05	1.5442		43	1739	-0.786936		43	1636	-1.89801		1160	0.14664	0.39245	0.699944		0.28475	0.452738	0.888481	0.826867	0.653293	0.356104
44	1834.85	1.53549		44	1732	-0.925811		44	1626	-1.77868		1140	0.26531	-0.113777	0.789577		0.08925	-0.0851449	1.15581	-0.24311	-0.137556	0.641085
45	1830.6	1.51418		45	1725	-0.0242192		45	1616	-1.40704		1120	0.00862428	-0.05956	0.725032		0.09285	0.470839	0.127213	0.428547	-0.970761	0.648663
46	1826.5	1.12861		46	1718	0.394457		46	1606	-0.439319		1100	-0.591587	-0.107955	0.454251		-0.0195	-0.0505634	-0.566426	0.393784	-0.243129	0.451647
47	1821.9	1.40228		47	1711	0.107337		47	1596	-0.334585		1080	-0.119779	0.402369	-0.0388999		-0.03955	0.114972	0.202379	-0.338806	0.73674	0.696105
48	1817.65	0.972251		48	1704	-0.00501213		48	1586	-0.976077		1060	-0.678547	0.185418	1.21799		-0.00875	-0.0933893	0.549998	0.493125	0.182324	0.254961
49	1813.6	1.25156		49	1697	0.248694		49	1576	-0.950407		1040	-0.961829	0.108552	1.13262		0.05855	0.296783	-0.708711	0.105299	0.24238	-0.0324911
50	1809	1.20932		50	1690	0.613474		50	1566	-0.495304		1020	-0.666445	0.633572	1.05638		0.0086	0.376594	0.106244	0.212923	0.825877	-1.01741
51	1804.95	1.0997		51	1683	0.219291		51	1556	0.244034		1000	-0.625408	0.446916	0.964217		-0.0221	0.452738	0.190387	0.502314	0.73674	-0.278267
52	1801	1.16267		52	1676	-0.178304		52	1545	0.796921		980	-0.510055	0.361511	0.771173		-0.09795	0.0435868	0.254832	0.437827	0.512319	-0.414003
53	1796.85	1.08946		53	1669	0.160853		53	1535	1.12932		960	-0.608704	0.481648	0.531164		-0.092	0.492757	-0.438767	-0.122398	0.246806	0.641744
54	1792.2	1.27616		54	1662	0.278118		54	1525	1.3978		940	-0.132906	0.836863	0.549506		-0.18795	0.278138	-1.32011	-1.07065	0.543295	1.13955
55	1788.05	1.16599		55	1655	0.0405043		55	1515	1.72219		920	-0.095428	1.0048	0.57652		-0.0385	0.057493		-1.06479	1.32845	0.953741
56	1784.1	1.30861		56	1647	0.382131		56	1505	1.52628		900	-0.115252	0.8196	0.369933		0.0121	0.0408056		-0.504817	0.076751	-0.365573
57	1780	1.38475		57	1640	0.141154		57	1494	1.42706		880	-0.465706	0.00460276	0.0909046		0.44235	0.484506		0.444752	0.937139	-0.393247
58	1775.85	1.21384		58	1633	0.6497		58	1484	1.5254		860	-0.962625	-0.0453316	-0.407378		0.67005	-0.211917		-0.347231	0.492089	0.922113
59	1771.75	0.927687		59	1626	0.422323		59	1473	1.25342		840	-0.694554	0.794763	0.0307738		0.8293	-0.685099		-0.396526	0.181692	0.439128
60	1767.5	0.597547		60	1619	0.180562		60	1463	1.38937		820	-0.151698	0.420721	0.299946		0.80325	-0.479287		-0.212109	0.827773	0.418701
61	1763.35	0.527401		61	1612	0.326606		61	1453	1.2895		800	-0.0739182	0.826516	0.676208		0.5829	0.520338		0.111728	-0.515596	1.00085
62	1758.55	0.888274		62	1604	0.318432		62	1442	1.02555		780	0.131873	0.603959	0.148392		0.30585	-0.215201		0.229579	0.120371	0.702364
63	1754.35	1.02142		63	1597	0.534114		63	1431	0.922416		760	0.264056	0.679069	-0.0967138		0.1482	0.306136		0.127153	0.848003	-0.212869
64	1750	1.35897		64	1590	0.35848		64	1421	0.848454		740	0.316783	0.747566	-0.223684		0.1224	0.487195		-0.290291	1.00857	0.275717
65	1745.25	0.782113		65	1583	0.593297		65	1410	0.690182		720	0.090439	1.0459	-0.24845		-0.0208	-0.128585		-0.305026	0.791107	0.418866
66	1741	0.389214		66	1575	0.468543		66	1400	0.340287		700	-0.372905	0.887722	-0.548398		0.0644	0.60478		0.114596	0.167152	-0.94443
67	1736.75	0.905199		67	1568	0.245618		67	1389	0.320654		680	-0.423755	0.566965	-1.65151		-0.1339	-0.352409		0.466789	-0.00985679	-1.59
68	1732.65	0.658688		68	1561	0.201863		68	1378	0.361397		660	-0.245046	0.422662	-0.942835		0.05495	-0.0226994		0.811074	-0.512435	-3.1233
69	1727.9	0.867846		69	1553	-0.00484475		69	1367	0.473947		640	-0.41974	0.192916	-0.0380166		0.0229	-0.023163		1.04232	-0.25514	-2.48283
70	1723.85	1.23883		70	1546	-0.184447		70	1356	0.282784		620	-0.532289	0.355927	0.0184409		0.28005	0.279065		0.901087	-0.176118	-0.751862
71	1719.75	1.5643		71	1539	0.417916		71	1346	0.104157		600	-0.274001	0.0278883	0.398009		0.2442	-0.129592		0.962496	-0.234911	-0.629963
72	1715.05	1.05015		72	1531	0.130516		72	1335	0.0457818		580	-0.30283	0.259245	0.592088		0.43455	0.987355		0.960274	0.14629	-0.475777
73	1710.95	0.990927		73	1524	-0.00166472		73	1324	0.110933		560	-0.730766	1.03409	0.474941		0.2384	-0.247053		1.70437	-0.219106	-0.468858
74	1706.8	0.786916		74	1516	-0.15093		74	1313	0.184199		540	-1.04998	-0.528371	0.42155		0.35125	0.318003		1.50892	-0.597778	0.421666
75	1702.2	1.16525		75	1509	-0.0709852		75	1302	0.0472832		520	-0.276533	-0.77457	0.378116		0.2845	-0.0194546		1.4432	-0.293071	0.287248
76	1698	0.322282		76	1502	0.0270914		76	1291	-0.0869064		500	-0.170988	1.43529	0.376545		0.55855	0.0460591		1.571	0.880244	1.09738
77	1693.35	0.104426		77	1494	0.0989535		77	1280	-0.421497		480	-0.158957	1.48864	0.443818		0.5634	-0.0998016		1.10924	0.877715	0.571899
78	1689.2	0.539941		78	1486	-0.0135413		78	1269	-0.853268		460	-0.950462	1.23628	0.616455		0.26175	0.226685		0.792498	-0.393586	0.0790303
79	1684.9	0.929646		79	1479	-0.0237709		79	1258	-1.7985		440	-0.529867	0.981216	0.234418		0.0047	-0.129314		-0.188828	-0.0597985	-0.0784505
80	1680	0.95313		80	1471	-0.0446906		80	1247	-2.09396		420	-0.660322	0.143751	0.146187		-0.38435	-0.853827		-1.30516	-0.10089	-0.0102527
81	1675.7	1.39911		81	1464	-0.327052		81	1236	-1.2012		400	-0.696179	-0.212734	0.481643		-0.4802	-0.88164		-0.753516	-0.0920393	-0.359972
82	1671.1	1.45356		82	1456	-0.129634		82	1228	-0.420528		380	-0.363639	0.199201	0.485713		-0.77305	-0.549003		-0.606802	-0.363874	-0.0545648
83	1666.95	1.34584		83	1449	0.141649		83	1220	0.136482		360	-0.162615	-0.323077	-0.00792452		-0.7701	-0.0509754		-0.601987	0.339735	0.689516
84	1662.45	1.11865		84	1441	0.394265		84	1212	0.345312		340	-0.0377611	-0.286209	-0.944992		-0.7129	-0.513589		-0.0078042	-0.863923	1.04302
85	1658.2	1.2678		85	1433	0.483503		85	1205	0.428617		320	-0.310366	-0.218647	-1.03431		-0.4505	-0.260496		0.697159	-0.680593	1.03347
86	1653.5	0.927894		86	1426	0.636461		86	1197	0.385832		300	-0.933872	-0.23777	-0.856664		-0.455	0.161723		1.00879	-1.18949	1.69634
87	1649.55	0.329857		87	1419	0.494699		87	1189	0.319088		280	-0.81408	-0.410093	-1.3247		-0.3835	0.056566		0.703473	0.487032	2.14407
88	1645.5	0.157867		88	1411	0.504007		88	1182	0.600632		260	-0.8288	-0.394346	-1.40158		-0.23395	-0.315008		0.837147	-0.0635915	0.732016
89	1640.9	0.0875757		89	1404	0.162129		89	1174	0.664881		240	-0.769778	-0.367593	-1.53085		0.04755	-1.00463		0.658906	0.168416	-0.711174
90	1636.25	0.319279		90	1397	0.168415		90	1166	0.735006		220	-0.738687	-0.320951	-1.31658		0.13385	-0.408829		0.787062	-0.291174	0.08529
91	1632.05	0.430117		91	1389	0.423918		91	1159	0.879401		200	-0.757374	-0.821654	-1.20145		0.3969	-0.953334		0.167898	-0.198877	1.27826
92	1627.6	0.458154		92	1384	0.371087		92	1151	0.777347		180	-0.869894	-0.848401	-1.25738		0.3151	-0.579411		-0.422041	-0.0225003	0.611764
93	1623.4	0.763599		93	1379	0.365241		93	1143	0.711982		160	-0.571703	-0.699577	-1.44606		0.29625	0.112191		0.0788379	-0.0370402	0.887849
94	1618.9	0.804638		94	1374	0.583145		94	1135	0.702638		140	-0.34147	-0.840892	-1.19523		-0.00935	-1.50417		-0.0461164	-0.254508	0.788023
95	1614.75	0.624672		95	1369	0.62282		95	1128	0.607745		120	-0.288953	-0.649029	-1.29374		0.04395	0.051467		-0.759523	0.59134	0.852268
96	1610.2	0.796214		96	1363	0.519644		96	1121	0.864714		100	-0.235122	-0.518464	-1.06508		-0.214	-0.117725		-0.741363	0.488928	-0.89287
97	1606.35	0.901611		97	1358	0.373112		97	1113	0.403138		80	-0.117686	0.0530497	-1.04909		0.18755	-0.521314		0.108842	0.308127	-0.336745
98	1601.95	0.834841		98	1353	0.369822		98	1105	0.505364		60	-0.152275	-0.364686	-1.11134		0.25465	0.405148		0.0847409	0.846106	0.854574
99	1597.8	0.657695		99	1348	0.552279		99	1097	0.108405		40	-0.177752	-0.786729	-0.751694		0.54535	-0.180767		-0.496652	1.14765	-0.668509
100	1593.1	0.659144		100	1342	0.557448		100	1090	-0.193753		20	-0.102929	-0.472614	-0.366946		0.4249	-0.12885		-0.107825	1.07622	0.111152
101	1589.05	0.364379		101	1337	0.630407		101	1082	-0.0313521		0	-0.409261	-0.527567	-0.299139		0.4387	0.0999533		-0.102824	0.174422	1.30914
102	1585.2	0.250255		102	1331	0.157684		102	1074	1.12106		-20	-0.0164511	-0.960142	0.136718		-0.0261	-0.751385		-0.668999	1.18733
103	1580.9	0.31328		103	1326	-0.11124		103	1066	1.31493		-40		-1.29944	0.082578		-0.13565	-0.126378		0.171636
104	1577.1	0.181164		104	1320	-0.233896		104	1059	1.12026		-60		-0.500978	0.250407		-0.30285	-0.616865		-0.412732
105	1573.1	0.464336		105	1315	-0.251853		105	1051	1.1218		-80		-0.385419	-0.438934		-0.4425	-0.00338525		-0.858144
106	1568.55	0.710566		106	1310	-0.342035		106	1043	1.15581		-100		-0.393231	-0.358879		-0.34955	-0.845792		-1.791
107	1564.55	0.744736		107	1303	-0.575546		107	1035	1.16407		-120		-0.344214	0.138326		-0.34155	0.0176286		-1.42479
108	1560.3	0.795064		108	1297	-0.393495		108	1028	1.14356		-140		-0.285613	0.342995		-0.28675	-0.0189911		-0.90761
109	1555.85	1.46351		109	1291	-0.25467		109	1020	0.861518		-160		-0.744221	0.319677		-0.1981	0.354468		-0.938933
110	1551.55	0.851186		110	1286	-0.0463792		110	1012	0.820987		-180		-0.510399	-0.314095		-0.0135333	-0.0862045		-0.812046
111	1547.65	-0.0723643		111	1280	-0.28691		111	1005	1.10745		-200		-1.92316	-0.55877		-0.0135333	-0.0509754		-0.464507
112	1542.9	-0.441875		112	1274	-0.318302		112	997	1.16913		-220			0.19209
113	1538.55	-0.678015		113	1268	-0.421754		113	989	0.699148		-240			0.139568
114	1533.95	-0.887176		114	1262	-0.352959		114	981	0.445239		-260			0.422703
115	1529.2	-0.563777		115	1256	-0.362125		115	973	0.541329		-280			0.921556
116	1524.4	-0.227345		116	1250	-0.00224293		116	965	0.521		-300			1.42616
117	1520.2	-0.0605796		117	1244	-0.0147139		117	957	0.603834
118	1515.8	0.288476		118	1238	-0.231575		118	950	0.501138
119	1511.35	0.289942		119	1232	-0.112411		119	942	0.543546
120	1506.8	0.234297		120	1226	-0.158342		120	934	0.303755
121	1502.15	0.302411		121	1220	0.0381749		121	926	0.849285
122	1497.6	0.237057		122	1213	0.106867		122	918	0.291886
123	1493.55	0.150551		123	1207	0.107613		123	911	0.424335
124	1489.35	0.122561		124	1200	0.316089		124	903	0.393577
125	1484.5	0.271562		125	1194	0.410685		125	895	0.390687
126	1480.1	0.260712		126	1188	0.252902		126	888	0.140888
127	1476.1	0.203921		127	1181	0.108685		127	880	-0.258862
128	1471.6	0.0869635		128	1175	0.361544		128	872	-0.443398
129	1467.5	0.419678		129	1169	0.329106		129	864	-0.371358
130	1463.35	0.489089		130	1162	0.486701		130	857	-0.0794625
131	1459.1	0.462723		131	1156	0.251219		131	849	0.0557019
132	1454.7	0.533574		132	1150	-0.287023		132	841	0.116082
133	1450.85	0.526863		133	1143	-0.305528		133	834	0.298186
134	1446.8	0.453464		134	1137	-0.153797		134	826	0.301705
135	1442.25	0.397451		135	1130	0.00100533		135	818	0.596626
136	1438.1	0.0876014		136	1124	-0.0258887		136	811	1.15444
137	1434.2	0.477111		137	1118	0.056188		137	803	0.277554
138	1429.9	0.626875		138	1111	-0.0790709		138	796	0.529194
139	1426.05	0.00887526		139	1105	-0.300981		139	788	0.0740437
140	1421.95	0.399996		140	1098	-0.107153		140	781	-0.158063
141	1417.75	0.0125477		141	1092	0.831999		141	774	-0.147507
142	1413.75	-0.186546		142	1086	0.482262		142	767	0.0269352
143	1410.1	-0.303854		143	1079	0.275702		143	760	-0.16957
144	1406.35	-0.232641		144	1073	0.192589		144	753	-0.200088
145	1402.5	-0.0549105		145	1066	0.217195		145	747	-0.182917
146	1398.35	-0.130442		146	1060	0.0561846		146	740	-0.288047
147	1394.6	-0.479075		147	1054	0.0728204		147	734	-0.261956
148	1390.75	-0.687915		148	1047	0.042325		148	728	-0.217042
149	1386.8	-1.56504		149	1041	0.21051		149	721	-0.266353
150	1382.25	-1.24208		150	1035	0.416569		150	715	-0.399462
151	1378.75	-0.670833		151	1029	0.635283		151	708	-0.47934
152	1374.9	-0.390055		152	1024	0.848864		152	702	-0.766393
153	1370.9	-0.255111		153	1018	0.584506		153	695	-0.924474
154	1367	-0.178794		154	1013	0.280055		154	689	-1.8318
155	1363	-0.341987		155	1008	0.39967		155	682	-2.19827
156	1358.5	0.0382198		156	1003	0.661024		156	676	-1.66672
157	1354.45	0.0949758		157	999	0.558768		157	669	-0.762209
158	1350.3	-0.0308847		158	994	0.260855		158	663	-0.399581
159	1346.25	0.111673		159	989	0.314047		159	656	-0.170913
160	1342	0.197093		160	984	0.312373		160	650	-0.221009
161	1337.95	0.185053		161	979	0.314596		161	643	0.277872
162	1334.2	0.0851086		162	974	0.606397		162	637	0.0946334
163	1329.8	-0.148484		163	969	0.574015		163	630	0.0439338
164	1325.9	-0.086543		164	964	0.431586		164	624	-0.0832447
165	1322	0.186921		165	959	0.489439		165	617	0.223723
166	1318.2	0.337296		166	954	1.03149		166	611	0.45971
167	1314.35	0.417662		167	949	0.740784		167	604	0.510595
168	1310.55	0.501717		168	944	1.08574		168	598	0.627899
169	1306.15	0.377158		169	939	1.55094		169	591	0.587091
170	1302.15	0.412844		170	934	0.708574		170	585	0.561274
171	1298.2	0.664206		171	929	0.754883		171	578	0.503877
172	1294.3	0.379509		172	924	1.01218		172	572	0.415361
173	1290	0.0694704		173	919	1.38283		173	565	0.505584
174	1286.05	-0.200829		174	915	0.810585		174	558	0.520858
175	1282.15	-0.358002		175	910	0.31936		175	552	0.482902
176	1278.25	-0.159952		176	905	0.800625		176	545	0.260892
177	1274.05	0.0883543		177	900	0.784597		177	539	0.374004
178	1270.25	-0.0936128		178	895	0.346089		178	532	0.31535
179	1266.4	0.0625359		179	890	-0.0281262		179	526	0.444994
180	1262.5	0.285647		180	885	-0.208735		180	519	0.400045
181	1258.1	0.196243		181	881	-0.0908166		181	512	0.296417
182	1254.25	0.143891		182	876	-0.217424		182	506	0.433172
183	1250.4	0.203105		183	871	-0.243345		183	499	0.276739
184	1246	0.311117		184	866	0.0224965		184	493	0.490832
185	1242.1	0.456415		185	861	0.256946		185	486	0.563882
186	1238.2	0.202723		186	857	0.324238		186	479	0.513105
187	1233.95	-0.315654		187	852	0.652475		187	473	0.776539
188	1230.2	-0.831746		188	847	0.671758		188	466	0.616046
189	1226.4	-1.17922		189	843	1.53058		189	460	0.56013
190	1222.1	-0.989884		190	838	0.378477		190	453	0.217422
191	1218.3	-0.606924		191	833	0.217828		191	446	0.251415
192	1214.45	-0.268323		192	828	0.475615		192	439	0.144401
193	1210.65	0.024191		193	823	0.610963		193	433	-0.229889
194	1206.4	0.0928187		194	819	1.06011		194	426	0.0544964
195	1202.55	0.0983569		195	814	0.573336		195	420	0.615738
196	1198.7	0.28826		196	809	0.471706		196	413	0.711928
197	1194.45	0.247543		197	804	1.20091		197	406	0.371916
198	1190.55	0.129064		198	798	1.04342		198	400	0.361084
199	1186.75	0.102005		199	792	0.671463		199	393	0.471803
200	1183.45	0.165699		200	787	0.333641		200	387	0.569733
201	1179.85	0.364572		201	781	0.367316		201	380	0.415604
202	1176.5	0.25805		202	775	0.76403		202	373	0.397412
203	1172.6	-0.0404885		203	769	0.652636		203	367	-0.0395713
204	1169.3	0.160297		204	764	0.62054		204	360	-0.381615
205	1165.6	0.200524		205	758	0.514968		205	354	-0.92008
206	1162.4	0.154816		206	752	0.507479		206	347	-1.11578
207	1158.55	0.202553		207	746	0.983318		207	340	-0.799112
208	1155.35	0.0953202		208	740	0.984499		208	333	-0.965918
209	1151.65	0.115644		209	734	1.57934		209	327	-1.08252
210	1148.4	0.442584		210	728	1.51719		210	320	-1.05449
211	1144.65	0.417029		211	723	0.0411656		211	313	-1.11583
212	1141.25	0.318733		212	717	1.76433		212	307	-0.654283
213	1137.4	0.214327		213	711	1.04267		213	300	-0.799875
214	1134	0.110414		214	705	0.540073		214	293	-1.24073
215	1130.05	-0.014799		215	700	0.203808		215	287	-1.32099
216	1126.75	0.183836		216	694	0.286048		216	280	-1.41237
217	1122.9	-0.450657		217	688	0.655504		217	274	-1.29307
218	1119.1	-0.594038		218	682	0.759342		218	267	-1.51787
219	1115.8	-1.02524		219	676	0.424857		219	260	-1.3938
220	1112.5	-1.11977		220	670	0.419528		220	253	-1.54589
221	1108.8	-0.439191		221	664	0.423602		221	247	-1.38249
222	1104.95	-0.344321		222	658	0.426657		222	240	-1.66415
223	1101.6	-0.0269625		223	653	-0.121676		223	233	-1.7456
224	1097.85	0.132001		224	647	-0.0159761		224	227	-1.05927
225	1093.95	0.0209095		225	641	0.482659		225	220	-1.14487
226	1090.65	-0.00903931		226	636	0.343566		226	214	-1.236
227	1086.8	-0.370176		227	628	0.445718		227	207	-1.02693
228	1083.05	-0.180783		228	621	0.278497		228	200	-1.34142
229	1079.8	-0.311589		229	613	-0.000194306		229	194	-1.40273
230	1076.05	-0.317846		230	606	0.0559709		230	187	-1.11302
231	1072.8	-0.436599		231	599	0.0299076		231	181	-1.2564
232	1068.95	-0.619053		232	591	0.194967		232	174	-1.43193
233	1065.65	-0.984687		233	584	0.552859		233	167	-1.46311
234	1061.85	-1.03455		234	577	0.691514		234	161	-1.44314
235	1058.1	-1.24258		235	569	1.02256		235	154	-1.16376
236	1054.85	-1.23724		236	562	1.38819		236	148	-1.12513
237	1051.1	-1.08056		237	555	1.0482		237	141	-1.29682
238	1047.3	-0.963816		238	548	-0.772579		238	135	-1.47417
239	1043.55	-0.86171		239	540	-1.86074		239	128	-1.24444
240	1040.35	-0.385062		240	533	-0.991722		240	121	-1.16261
241	1036.65	-0.624925		241	525	-0.557417		241	115	-0.985908
242	1033.3	-0.714157		242	518	1.28968		242	108	-1.08541
243	1029.4	-0.733757		243	511	1.45841		243	102	-1.12393
244	1026.15	-0.606441		244	503	1.55779		244	95	-1.02825
245	1022.3	-0.652943		245	496	1.63688		245	89	-0.99299
246	1018.45	-0.657683		246	489	1.48864		246	82	-1.12603
247	1015.2	-0.655776		247	481	1.3404		247	76	-0.958852
248	1011.4	-0.749239		248	474	1.27099		248	69	-1.20472
249	1008.05	-0.818138		249	466	1.20157		249	63	-1.17044
250	1004.25	-0.990874		250	459	1.13216		250	56	-0.889791
251	1000.4	0.119263		251	451	1.09552		251	49	-0.776844
252	997.1	-0.608735		252	444	0.715964		252	43	-0.588447
253	993.4	-0.563797		253	437	0.346939		253	36	-0.468067
254	989.55	-0.356765		254	429	0.120388		254	30	-0.39152
255	986.2	-0.44189		255	422	-0.0360744		255	23	-0.24125
256	982.45	-0.579086		256	415	-0.348554		256	17	-0.169811
257	978.6	-0.768497		257	407	-0.253692		257	10	-0.264177
258	975.4	-0.574508		258	400	-0.0359559		258	4	-0.463428
259	971.6	-0.859673		259	392	0.234073		259	-4	-0.00402958
260	968.3	-0.749137		260	385	0.16433		260	-10	0.322118
261	964.55	-0.431375		261	377	-0.0636568		261	-17	0.0920654
262	960.85	-0.269031		262	370	-0.374713		262	-23	0.171746
263	957.7	-0.355585		263	362	-0.530862		263	-30	0.17175
264	953.95	-0.185021		264	355	-0.258788		264	-36	-0.0957616
265	950.1	-0.0818267		265	348	-0.317177		265	-43	0.273441
266	946.85	0.0414685		266	340	-0.282661		266	-49	0.404323
267	943.2	-0.0835655		267	333	-0.237643		267	-55	0.0734568
268	939.4	-0.263886		268	325	-0.19965		268	-62	-0.25712
269	936.1	-0.207069		269	318	-0.255987		269	-68	-0.562755
270	932.3	-0.263702		270	310	-0.280714		270	-75	-0.496926
271	928.95	-0.0376341		271	303	-0.17661		271	-81	-0.512954
272	925.4	0.0953805		272	298	-0.323268		272	-88	-0.394075
273	921.65	0.104342		273	293	-0.356712		273	-94	-0.169609
274	918.35	0.223793		274	288	-0.534134		274	-101	-0.105461
275	915.05	0.0277526		275	282	-0.426257		275	-107	0.142332
276	911.25	-0.186589		276	277	-0.385791		276	-113	0.481269
277	907.6	-0.271233		277	272	-0.286547		277	-120	0.035164
278	904.4	-0.232272		278	267	-0.476014		278	-126	-0.022208
279	900.7	-0.252964		279	262	-0.429032		279	-133	0.239567
280	897.05	-0.120672		280	257	-0.360484		280	-139	0.811626
281	893.8	-0.171375		281	252	-0.407173		281	-145	0.710421
282	890.3	-0.421336		282	247	-0.391117		282	-152	0.306345
283	886.65	-0.584287		283	242	-0.311597		283	-158	-0.0577369
284	883.65	-0.563278		284	237	-0.576033		284	-165	-0.216737
285	880	-0.933286		285	232	-0.149256		285	-171	-0.731424
286	876.7	-1.12342		286	227	-0.281751		286	-178	0.00587499
287	873	-1.28902		287	222	-0.276765		287	-185	-0.595971
288	869.25	-0.958565		288	217	-0.599125		288	-192	-0.761246
289	865.35	-0.780303		289	212	-0.729396		289	-199	-0.319093
290	861.85	-0.661807		290	207	-0.962712		290	-206	-0.148626
291	857.7	-0.305152		291	202	-0.995382		291	-213	0.282383
292	853.65	-0.46116		292	197	-0.99535		292	-220	0.442512
293	849.4	-0.591838		293	192	-0.839028		293	-227	0.0492969
294	845	-0.930396		294	187	-0.884797		294	-234	0.22984
295	840.75	-1.18422		295	182	-0.674429		295	-241	0.0753415
296	836.75	-1.14349		296	177	-0.639453		296	-248	0.206573
297	833	-0.498815		297	172	-0.68783		297	-255	0.664636
298	828.75	-0.0989564		298	167	-0.637084		298	-252	0.744262
299	824.45	0.817604		299	162	-0.833942		299	-269	0.805706
300	820	0.16517		300	157	-0.992086		300	-276	1.03741
301	815.65	-0.187379		301	152	-0.898393		301	-283	1.42616
302	811.6	-0.00971282		302	147	-0.78065
303	807.4	0.0438704		303	142	-0.692437
304	803.1	-0.142452		304	137	-0.667838
305	798.95	0.043133		305	132	-0.824284
306	794.9	0.124275		306	127	-0.594727
307	790.7	0.177212		307	122	-0.509268
308	786.55	0.164189		308	117	-0.687985
309	782.9	0.150554		309	112	-0.450202
310	778.65	0.130903		310	107	-0.414974
311	774.4	0.195904		311	102	-0.520697
312	770.35	0.292748		312	97	-0.588619
313	766.4	0.408009		313	92	-0.291803
314	762.3	0.292716		314	87	0.0423398
315	758.25	0.345254		315	82	1.05028
316	754	0.417264		316	78	0.0555277
317	749.95	0.251834		317	73	-0.361255
318	745.7	0.212278		318	68	-0.534952
319	741.6	0.357287		319	63	-0.618065
320	737.4	0.228389		320	58	-0.803416
321	733.15	0.318101		321	53	-1.09315
322	729.05	0.155795		322	48	-0.787956
323	725.55	-0.133307		323	43	-0.462398
324	721.4	-0.116783		324	38	-0.54163
325	717.05	-0.411647		325	33	-0.473395
326	712.85	-0.416966		326	28	-0.492705
327	708.75	-0.311138		327	23	-0.382725
328	704.6	-0.475897		328	18	-0.462145
329	700.6	-0.248877		329	13	-0.528279
330	696.5	-0.660471		330	8	-0.579673
331	692.45	-0.437799		331	3	-0.540172
332	688.3	-0.34098		332	-3	-0.381702
333	684.2	-0.388943		333	-8	-0.528048
334	680.2	-0.290582		334	-13	-1.18551
335	676	-0.294721		335	-18	-1.7453
336	672	-0.285239		336	-23	-2.13517
337	668	-0.260531		337	-28	-1.41169
338	663.75	-0.189061		338	-33	-0.937945
339	659.65	-0.195679		339	-37	-0.712965
340	655.6	-0.287382		340	-42	-0.52731
341	651.95	-0.298268		341	-47	-0.504697
342	647.95	-0.327708		342	-52	-0.486908
343	644	-0.536595		343	-57	-0.484997
344	639.95	-0.648745		344	-62	-0.30825
345	636.4	-0.757485		345	-67	-0.313949
346	632.25	-0.649853		346	-72	-0.377609
347	628.7	-0.481696		347	-77	-0.541869
348	624.75	-0.362894		348	-82	-0.513606
349	621.35	-0.409516		349	-86	-0.347965
350	617.95	-0.317345		350	-91	-0.289929
351	614.05	-0.386542		351	-96	-0.421425
352	610.7	-0.0649141		352	-101	-0.394258
353	607.2	0.0764965		353	-106	-0.366303
354	603.35	-0.608235		354	-111	-0.339819
355	600.1	-0.343467		355	-116	-0.276478
356	596.95	-0.254216		356	-120	-0.181834
357	593.5	-0.267907		357	-125	-0.244313
358	589.8	-0.327308		358	-130	-0.310548
359	586.4	-0.350639		359	-135	-0.405758
360	583.3	-0.314081		360	-140	-0.421055
361	579.45	-0.32559		361	-144	-0.699539
362	576.1	-0.253383		362	-148	-0.811621
363	572.8	-0.340192		363	-152	-0.939562
364	568.85	-0.605781		364	-156	-0.849325
365	565.55	-1.08798		365	-160	-0.689812
366	562.3	-1.77167		366	-164	-0.573252
367	558.3	-2.31986		367	-168	-0.425817
368	554.9	-1.79907		368	-172	-0.403217
369	551.7	-1.1082		369	-176	-0.459899
370	548.4	-0.565284		370	-180	-0.726805
371	544.65	-0.368184		371	-184	-1.4796
372	541.25	-0.1393		372	-188	-2.95545
373	538.1	-0.145938		373	-192	-3.00771
374	534.2	-0.24188		374	-196	-1.44622
375	530.85	-0.272376		375	-200	-1.54395
376	527.55	-0.372555
377	523.9	-0.376305
378	520.7	-0.250143
379	517.35	-0.27049
380	513.4	-0.358366
381	510.3	-0.172058
382	506.95	-0.0386962
383	503.6	-0.0602657
384	500.35	-0.126056
385	496.45	-0.143082
386	493.1	-0.15403
387	489.85	-0.164274
388	486.55	-0.125298
389	482.8	-0.15965
390	479.6	-0.20741
391	476.3	-0.697467
392	472.35	-1.14175
393	468.95	-1.12611
394	465.6	-0.99038
395	462.15	-0.796604
396	458.9	-0.694645
397	455.1	-0.511572
398	451.75	-0.411772
399	448.4	-0.524712
400	445.1	-0.513778
401	441.9	-0.522724
402	437.95	-0.5161
403	434.55	-0.436989
404	431.3	-0.472087
405	427.6	-0.578336
406	424.1	-0.784588
407	420.8	-1.17383
408	417.3	-1.42132
409	413.95	-1.11737
410	409.85	-0.659353
411	406.55	-0.36633
412	403.25	-0.243112
413	400.05	-0.369597
414	396.75	-0.371568
415	393.45	-0.30512
416	390.2	-0.419776
417	386.85	-0.413336
418	382.8	-0.308394
419	379.35	-0.144472
420	375.85	-0.359164
421	371.9	-0.126722
422	368.3	-0.171819
423	364.7	-0.140805
424	360.7	-0.0327098
425	357.35	-0.155209
426	353.95	-0.0764828
427	349.8	0.0172012
428	346.2	0.233008
429	342.75	-0.207324
430	339.15	-0.238951
431	335.25	-0.26407
432	331.5	-0.277326
433	327.9	-0.291353
434	323.65	-0.282557
435	319.75	-0.507938
436	316.15	-0.691245
437	312.15	-0.775739
438	308.45	-0.900159
439	304.9	-1.15066
440	300.8	-1.15155
441	297.1	-0.922043
442	293.45	-0.78222
443	289.2	-0.732334
444	285.6	-0.75106
445	282.1	-0.882744
446	277.7	-0.826994
447	274.05	-0.869986
448	270.4	-0.828792
449	266.25	-0.842349
450	262.8	-0.775879
451	259.1	-0.801998
452	255.1	-0.734789
453	251.3	-0.762066
454	247.6	-0.78536
455	243.75	-0.705819
456	239.65	-0.828637
457	236.35	-0.827109
458	232.5	-0.800203
459	228.3	-0.828033
460	224.55	-0.698097
461	220.8	-0.539992
462	216.7	-0.627811
463	213.05	-0.801767
464	209.4	-0.72256
465	205.2	-0.810069
466	201.9	-0.824661
467	198	-0.888246
468	193.8	-1.03631
469	189.75	-0.968975
470	186	-0.698971
471	182.5	-0.756966
472	178.25	-0.662816
473	174.55	-0.618731
474	171.1	-0.519202
475	166.9	-0.568531
476	163.4	-0.585444
477	159.8	-0.475494
478	155.65	-0.484123
479	152.05	-0.445337
480	148.4	-0.317457
481	144.6	-0.245357
482	140.8	-0.215073
483	136.65	-0.304205
484	133.1	-0.228845
485	129.3	-0.253063
486	125.2	-0.321052
487	121.55	-0.337599
488	118.05	-0.345826
489	113.75	-0.4126
490	110.1	-0.273394
491	106.6	-0.0534475
492	102.35	-0.0903443
493	98.45	-0.0336044
494	94.9	-0.0515409
495	91.2	-0.0537655
496	87.3	-0.22896
497	83.2	-0.168643
498	79.75	-0.169601
499	76.3	-0.103367
500	72.15	-0.20267
501	68.5	-0.154488
502	64.5	-0.146089
503	60.5	-0.154761
504	56.5	-0.142765
505	52.5	-0.2203
506	49	-0.390933
507	45	-0.0963347
508	41	-0.0384262
509	37	-0.111359
510	33	-0.0321578
511	29.5	-0.0405927
512	25.5	-0.114372
513	21.5	-0.216163
514	17.5	-0.246395
515	13.5	-0.271014
516	10	-0.431293
517	6	-0.574639
518	2	-0.522965
519	-1	-0.324255
520	-4	-0.0176122
521	-6.5	0.0587936
522	-10	0.0829494
523	-13	0.117869
